# Supplementary material for: Potent Inhibition of HIV-1 Reverse Transcriptase and Replication by Nonpseudoknot, “UCAA-motif” RNA Aptamers
Source: PubMed Central journal article supplement — Mol Ther Nucleic Acids. 2013 Feb 5;2(2):e71–. doi: 10.1038/mtna.2012.62 (PMC3586799; doi:10.1038/mtna.2012.62), 2013-02-05
Supplement: mtna201262x1.pdf [file mtna201262x1.pdf]

## Supplementary Figure S1a

### 70HRT<sub>14</sub> Population

5' gggaaaagcgaaucacacaaga. . . (70HRT) . . . gggcauaagguuuuuuuuccaua 3'

#### SIX

70.03 AGATGAATCACAGCCGCTCAACGAGATGCGAAGGAAAACGGGATAACCAAATAGATGGAACGAAGACC  
70.04c **AGATGAATCACAGCCGCTCAACGAGATCCGAAGGAAAACGGGATAACCAAATAGATGGAACGAAGGCC**  
70.32 **AGATGAATCACAGCCGCTCAACGAGATCCGAAGGAAAACGGGATAACCAAATAGATGGAACGAAGGCC**  
70.54 AGATGAATCACAGCCGCTCAACGAGATCCGAAGGAAAACGGGATAACCAAATAGATGGAACGAAGGCC  
70.76a **AGATGAATCACAGCCGCTCAACGAGATCCGAAGGAAAACGGGATAACCAAATAGATGGAACGAAGGCC**  
70.42 AGATGAATCACAGCCGCTCAACGAGATCCGAAGGAAAACGGGATAACCAAATAGATGGAACGAAGGCC

#### FIVE

70.50 TGAAAAATGCAGACCAAGAAAATCCGAGGTGATAAACGGGAAAACACAGAGAAACA-ATAACGTTGCAAGTC  
70.5c **TGAAAAATGCAGACCAAGAAAATCCGAGGTGATAAACGGGAAAACACAAAGAAAACACATAACGTTGCAAGTC**  
70.52 TGAAAAATGCAGACCAAGAAAATCCGAGGTGATAAACGGGAAAACACAAAGAAAC-AATAACGTTGCAAGTC  
70.59 TGAAAAATGCAGACCAAGAAAATCCGAGGTGATAAACGGGAAAACACAAAGAAAACACATAACGTTGCAAGTC  
70.79 TGAAAAATGCAGACCAAGAAAATCCGAGGTGATAAACGGGAAAACACGAAGAAAC-TATAACGTTGCAAGTC  
  
70.22 TGAACAAACGCGATGAACATTAGGCTATCCTCAGGCGGAGAGGGACAAAACGCACCTATCCCTAAGGC  
70.33 **TGAACAAACGCGATGAACATTAGGCTATCCTCAGGCGGAGAGGGACAAAACGCACCTATCCCTAAGGC**  
70.34a **AACAAACGCGTAGAACATTAGGCTnCTCAGGCGGAGAGGGACAAAACGCACCTATCCCTAAGGC**  
70.65 TGAACAAACGCGATGAACATTAGGCTATCCTCAGGCGGAGAGGGACAAAACGCACCTATCCCTAAGGC  
70.76b **TGAACAAACGCGATGAACACTAGGCTATCCTCAGGCGGAGAGGGACAAAACGCACCTATCCCTAAGGCAC**

#### FOUR

70.30 AGCGCGGCACCCAAAATCGAAATCCGAAGGCGAACGGGAGAATGCGACCAAAGATACCCTGTGAATGGC  
70.40 **AGTGCGGTACCCAAAATCGAAATCCGAAGGTGAACGGGAGAATGCGACCAAAGATACCCTGTGAATGGC**  
70.45 **AGCGCGGCACCCAAAATCGAAATCCGAAG-CGAACGGGAGAATGCGACCAAAGTAAACCCTGTGAATGGC**  
70.72 AGCGCGGCACCCAAAATCGAAATCCGAAGGCGAACGGGAGAATGCGACCAAAGATACCCTGTGAATGGC

#### THREE

70.17 **CCCTCCTCGTATG-ACGCTAA-CTGAGAATCCGAAGTCCAACGGGAGAGA---GGACACTTATGACGCGGCGCG**  
70.27 **CCCTCCTGTGATG-ACGCTAA-CTGAGAATCCGAAGTCCAACGGGAGAAA---GGACACTTATGACGTGGCGCG**  
70.38 **CCCTCCTGTGATGGCGCTAAACTGAGAATCCGAAGTCCAACGGGAGAAAAGGACACTTATGACGTGGCGCG**  
  
70.62 TTGGAAAAACCGAGATGAATCCGATAAGCAACGGGAGAATGCTTAAAGATGGGATACAACCGATGCTCAC  
70.64 TTGGAAAAACCGAAATGAATCCGATAAGCAACGGGAGAATGCTTAAAGATGGGATACA-CCGATGCTCAC  
70.80 TTGGAAAAACCGAAATGAATCCGATAAGCAACGGGAGAATGCTTAAAGATGGGATACAGCCGATGCTCAC  
  
70.24 GACGCAACCGAGATCATCCCAAGGAGAAGGAGAAAACCAACGCATGGAGTTGATTAACGTGCCAGCAC  
70.35 **GACGCAACCGAGATCATCCCAAGGAGAAGGAGAAAACCAACGCATGGAGTTGATTAACGTGCCAGCAC**  
70.67 GACGCAACCGAGATCATCCCAAGGAGAAGGAGAAAACCAACGCATGGAGTTGATTAACGTGCCAGCAC  
  
70.26 **TGCTAAACCAAGTAAGAATCCGTGAAGTCACAGCACGGGATAAAAAGTGTGTCAAAACGCCATAGCT**  
70.37 **TGCTAAACCAAGTAAGAATCCGTGAAGTCACAGCACGGGATAAAAAGTGTGTCAAAACGCCATAGCT**  
70.69 TGCTAAACCAAGTAAGAATCCGTGAAGTCACAGCACGGGATAAAAAGTGTGTCAAAACGCCATAGCT  
  
70.29 **TCAGTGTGTGCACGCAAAACACCACACGAGAGATAGAAATCCGGGAGGCTCGCACCTGGGACATACACCGC**  
70.39 **TCAGTGTGTGCACGCAAAACACCACACGAGAGATAGAAATCCGGGAGGCTCGCACCTGGGACATACACCGC**  
70.71 **TCAGTGTGTGCACGCAAAACACCACACGAGAGATAGAAATCCGGGAGGCTCGCACCTGGGACATACACCGC**

#### TWO

70.08 CGAGACAAGTACCGAAAAAGAGATCTGGCAGTGTCAACAACAGGAAAAAGACACGACGAACACGCCGCAC  
70.13 CGAGACAAGTACCGAAAAAGAGATCTGGCAGTGTCAACAACAGGAAAAAGACACGACGAACACGCCGCAC  
  
70.12 TATCCGAGCCAAAACGGGAAAAGATGGGAAAAATGGAATTAGTCTCTAACCCACGCGGAAAACCAACGT  
70.16 TATCCGAGCCAAAACGGGAAAAGATGGGAAAAATGGAATTAGTCTCTAACCCACGCGGAAAACCAACGT  
  
70.21 **CTGTGCTGGCTAGACTATCCGAAAAGTTGAATCCGAGGCGAAAACGGGAAAAGACCGCGACCCACACACC**  
70.53a **CTGTGCTGGCTAGACTATCCGAAAAGTTGAATCCGAGGCGAAAACGGGAAAAGACAGCGACCCACACACC**  
  
70.31 **CTAACCGCCATCTACGCGATCTGACACAAAACAAACGAGAACTCATCCGAGGCCTAACGGGACAAAC**

70.41 CTACGCGCCATCTACGCGATCTGACACAAACAAAACGAGAACTCATCCGAGGCCCTAACGGGACAAC  
**70.36 CCACGCCATACCGAACGAAGATCCGAATCGTCACGGGAAAAGACGAAAAAAAGCAACCGAAATGACCGC**  
70.68 CCACGCCATACCGAACGAAGATCCGAATCGTCACGGGAAAAGACGAAAAAAAGCAACCGAAATGACCGC  
  
70.48 TGAACGTACGACGTAGCTAGACCAAGATCCGAAGATGCACGGGAGAAGCATCAATACCACAGTATGGCC  
**70.70 TGAACGTACGACGTAGCTAGACCAAGATCCGAAGATGCACGGGAGAAGCATCAATACCACAGTATGGCC**  
  
70.23 ATGATTGCGACTTCGAACGAAGATCCGAGACGCGACGGGAGAACCGGAAGGAAAACACCGAAATGCAACGT  
**70.34b ATTGCGACTTCGAACGAAGATCCGAGACGCGACGGGAGAACCGGAAGGAAAACACCGAAATGCAACGT**

ONE

70.01 ACGTTTGTGCACGGATGCCACGGTTCGCACGAAACCTTGTGTGGGATAGCGCGAATACTGACGAGTGTGC  
70.02 TGAACAGCATAATGCCACGGCACAATACCAAAGACAGATCCTGAAGCAGAGCACAGGGACCAACGC  
70.04 ATTGCGACTTCCAAAAGAGATCCAGGGAGCAGGCGCACTGGGAGAAAACTGCCTGCAGAAAAATGGTAC  
70.05 TCCGAGGCAGAACGGGAAAACTGCGAAGTAACTGTGGAATCCGTGACCTTTGACGTGAAAAACCGCGA  
70.06 CCTACTGGTAAAGCGGCTTGGCAGATTACCGCCGATCCATGTTACTGATCCGAACGCAACGGGATAATGC  
**70.07 TGTAAGTATAGCCGTTTTCGAATGTAAAACCGGAAGCTCCGAACCGAGAAAAAGACGGAACAACATGCGA**  
70.09 GTGGAGAATCGCCTATAATAACCCGAGAAATCGCATCCGAAGGTGAACGGGAGAATCACCGACCTCGATC  
70.10 AATATCCGTTTACCATTCCGGGAAAAATGGGTTGGTAAAAATACTTGACCCCGAAGGACGACGAATCCGGAC  
70.11 CCTCGGGTCCAGCAAAATCCGAAGGAAAAACGGGATAACCAACAACAATGAAAAACAGCCAGTAAGCGT  
70.14 TCCGACGTACGACGGGATAACGTTCAAAGCAAGGGACTTTAAAGTAAACCGCTGCCGATGATCAACGCAT  
70.15 TCACTTGAAAGACGCAGACCTACGAACCCAGGAGATAAGGGGAAAACTCTGGAACCAACCGGTAGTC  
70.18 AACCAAGGTGAAAAATGGGAAAAACACATAAGGGAGTGAAATAGACGGTCTAAACCAACTGGCGAAC  
70.19 ACCGAATAAACGAGAAAAACAATGTGTAACACACCGCTACTACCGAACCAAGAGGAAAGAAAGCGTCCGT  
70.20 CTTTTTCGCTTGTAACCCCAAAACGAAATCCGAAAGGCAACGGGAAAAATAGCCTAGACCATGTCCGCACG  
70.27 CCCTCCTTGTATGACGCTAACTGAGAAATCCGAAGTCCAACGGGAGAAAGGACACTTATGACGTGGCGCG  
70.28 ACCGGACGGGTGAGAACCGAGACAAACACCCACCAAGAGAAAAATGTATCCACTACCCAGACGGCCTCGAT  
70.43 ATGAACGCAACCCAAAGCTTAACCGAGGTGTAAACGGGATAACACAAGTTGGAAGGAAGATCAGGGAGCA  
**70.44 CCCGCACCAATGAAGATCCGAGACCAACGGGAAATGGTCAACCAAGGAATAGATGCACGCCTCACAT**  
70.46 GATAGCTTAGACCACAAAATGGGACGAGCAAGGGGAAAAATGCTCAAAGGAACCCGAAACTGAGTGTGCAC  
**70.47a TGGCGCATGCCAAAAGCTCCGAGCCGTTAACGGGAAAAAGACGGAGTCAAGGCTGCCT**  
**70.47b TCGCCTGCCAAAAAATCCGCGCCGTAACGGnCCAAGCCCGAAGATAAAGGCTGCCTAATACACAGCGCA**  
70.49 AGATAAAGTGATGGATTGCTGAAGTCTCTCAACGATCCGATGACAACGGGAAAAATGTCAAAAACGACC  
**70.53b NNGNNNTNGNATCCNAGGCAGAACGGGACAATCNGNNNNNAAGAGGTGTTAANCCTATTCCTGAT**  
70.55 TACATTACAGAGGTGAGTATCAAAAATGTTGAAACGTATTCTCAGGAAATCCCAGGCCTAAGGGGACAAC  
70.57 ACGCGACCCAGTGAATCCGAAGCTTGACGGGAGAACAAGCAAGACGTGATTAAGCACCACCAATGCCAAT  
70.58 ACCAAATCCCGAATACAAATCCGAACGCTAACGGGACAATTCGAAATGGAACATACGGGCTGGTTGAA  
70.60 CACCATACCAATGGCATCGCTATGATCGAGCGCTACGCTAGACCAATCTGGAGCTGACCACAGGGAACG  
70.61 CCCAGAACTAACCATATCCGACAGCGAAACGGGAAAAATGAGGCAGAGCCGAACCAAAATCTGTGTGCAC  
70.63 CGCAAAACCACTCGATCCGAAGGAAAAACGGGATAACCAAGATGGGAAACAACCTTACACACCGAATCAC  
70.73 GATTCTAACCTGAGATGAATCCGAAGCAAGAGCCGGGAGAAAACTTGCAAGACTACCAAAATGTCGTTG  
70.74 GCGAAAGAACTTAGTGTGATAGCATTGACCAACCAATGACAATCCGAGCCGCCACGGGATAC  
70.75 CTCTTACCAAGACTGATCCGAAGGCAACGGGACAAAAGCCAAAGGAAAAACCTAAGTACGCGAGACTGC  
70.77 ATCCGAAGGCAACGGGAAAAATCAGTCCGAGAAAAAGGAGAACACCTTAACTCACTGTGTACGCAA  
70.78 CGCGAACGATAAATCCGAACGAGGACGGGACAAAACCTGAGCAATGATACCTAATCTCCCTACCATCGCTGAA

Supplementary Figure S1b.

80HRT<sub>14</sub> Population

5'gggcuaaagguuuuuuuuccaua. . . (80HRT) . . . uugauucggaugcuccgguagcucaaccug 3'

THREE

80.08 AGCCGTTAAGCAGTGTCCGCTACCTTCATCCGTTGGCGATCGGGAGAAATCGCAAGAGGAGGCACCGCGCTCCGTATCAT  
80.72 A-CCGTTAAGCAGTGTCCGCTACTTTCATCCGTTGGCGATCGGGAAAAATCGCAAGACGAGGCACCGCGCTCCGTATCGT  
80.90 AGCCGTTAAGCAGTGTCCGCTACTTTCATCCGTTGGCGATCGGGAAAAATCGCAAGACGAGGCACCGCGCTCCGTATCAT

TWO

80.02 TGCAAGCCTGATGATCCGAAGGTGACGGGAGAACACCAAACAGTATGCTAATCCACCATCCGAAACCGACTGCTACTA  
80.105b TGCAAGCCTGATGATCCGAAGGTGACGGGAGAACACCAAACAGTATGCTAATCCACCATCCGAAACCGACTGCTACCA

80.46 GCTCGCCAATCCGTTTCCAGCAGTCTTCGGGATAAAACACTGCTACTCGAGGCCGTTGCATTCCGGCCATTACTCCA  
80.100 GCTCGCCAATCCGTTTCCAGCAGTCTTCGGGATAAAGCACTGCTACTCGAGGTCGTTGCATTCCGGCCATTACTCCA

80.55 ATGGCTCACCACAAGGGGAACGTTGATGAAATAGAGTTTATCCCTTGGACTCACGCCGGCGTGTCCACACAATCCA  
80.65 ATGGCTCACCACAAGGGGAACGTTGATGAAATAGAGTTTATCCCTTGGACTCACGCCGGCGTGTCCACACAATCCA

80.09 ACCGCATGGAATAAGTTCAACACCCCACTACGATCTGTGCGGCCAACACAGGGAGAAAACCGGCCAAGAGGAGGCTAC  
80.87 ATCGCATGGAATAAGTTCAACACCCCACTACGATCTGTGCGGCCAACACAGGGTAAAAACCGGCCAAGAGGAGGCTGA

ONE

80.01 . . . TGCGAAGAACCCGTAGTTAAACTAGATTTACAAGGAGAGCGGATCGAGGGAAACGGAGAGA  
80.05 CAGAAATCGAATATCGAAGCTCATTGACCCTCAATCCGATGCGAGATGGGATAAACTCGCACCCCTCCGCCCCACGACT  
80.07 TCGCACATAAAGTGGATGATGCCACCCTTCTGTAAATATCCGTTACTGTGCCTCGGGATAAAGGCGCTACGAAGT  
80.10 CCNNTGTACCTTCCGAGTTTGGTAACGTGTTTCTGCCAGTAGTTCTTACAAATGAAGTCCGAGGGTAGATCGTA  
80.13 CTCCACATTCACTGCTGCACAAAATCCAAAAAACACATCCTCGAAAGCTCATAATTGGGAATGCATATGTCAAGGTGGGA  
80.15 GGCACAGAAATACCATAGCCGAAAATCCAGGGCAAAGGGGACAAGTCTGCATTATGTCTACTGCGATCGAAAAGT  
80.16 ACGGTGGTTAGCATACACTCAAAAATCTTCAAGCAAGTCTGGCATAAAGCCCTCATACACTCCCTCGGTTTCCC  
80.17 TCGACCCTCACTGTAATCCGTTTTCGTTGGCTTCGGGAAAAAAGCCGGCACATGGCCCGACGTGTCATCAAATCAAGTC  
80.18 TCTGGCATCGTACAATGAGTCTGGCCAGATTAAGTATCGGAAAGCTGCATCGGGACACAAGCACAGCGATAATGAG  
80.21 AGCCTAGTACCCTAACGTGATCCGTTCTGTATAGTTCGGGAAAAACTATAACAATAAATACCGCTATATTTCA  
80.28 GGGTGAAGGCACGTGTTAAATCAAGTCTGATGGAAAGAAGGAAAACCTAGGAATGGGACCTCCAGTGACAATGAAGTGC  
80.30a AGCCAACCGCTAATCCGATCGTCCGACGGGAAAATGGGACGGCAATAGTTTACCnCTGAGCAAGTATTTAAGTAAGTAGTT  
80.30b TGTCAGCGAA TCTACGACCAC'TTTCAGTGGACGATAGGTTACATGTTCCGTTACGTGTTTCGGGAAAAAATCGGCTCG  
80.31 TGAACTCATCCAGTAAATCCCACTCGCGGAAAGTGGGAGCAATAGAAATTCGCGCCTATCTCAATACGGGATCAGTCTATG  
80.32 TCCCTAGCATCCTTGACCAATACCGTTTCGGAGGCCAACAGAGAAAACCTCCACGAGCAGGAGCACGGCATGCGTATAC  
80.33 GCGTCGTATTGCGGTTGAGAGAAGACTTGACACAAAGACATGGATCCGATAGCCAAAACCATGACCCAATCCGTTACAA  
80.34 GCCAAAACGATCCGGCCGCGAGACAACCGTGAAAACCCGTTACCTGGCTGTACCGACACTTCGATAGTCAACATTAGACG  
80.35 CGTATAGTCCAAAACAAGTATCCGATGTCCACGGGAGTAAGGACCGATGTGCGGCTGAAGCACCGAATTGATTGTATG  
80.37 CGCACCGCACACCGCACCTCAAATCCGTTCCGTAATTCGGGATAAATTTACGACTTTTACTACCAACACGATTACCA  
80.39 CGGTCCAATTAATCCGTTTTCGATCGGGAAAAATCGTGGCACCGGGCCCTAAGTTTCTTCGCTGGACACTTTCAGT  
80.49 TGCTTATCGAACATCCGTTTGGCTGGCGTCGGGAAAAATGCCACGCGAGTCTGGTGCATCGTGTGCACACGAGAATCTA  
80.51 TCCCAATCTCTGTTATCCGGCGGAGAGGACACCGGGAGAAAAAAGCTCTCACGACGCGACTGGCACACGGATATAAGGTT  
80.52 GCGACCCAGACTGATCCGTTTGGGGCTCGGGATAAAGTTCGCGCCATTCACCGGACTCGCTCATCTACAAAAG  
80.54 CAGTCCATCAAATCCGTCAGCCGTAGACGGGAGACAAAATCGGCATGACCCAAGAAAAAGAGAGATGTGAAAAGT  
80.57 TGCTTCTGGGATCCGATCGCAACGGGATAATGGCAACTTGACCACGCTAGGTAAGATCAAATTTCCCTTCTAT  
80.59 ACGCCAACGACACAAGTCTGGCTGGTCCAAACAGGACAAGACCCACATAAACGCTTACCTTCTGTGACAACCTAG  
80.60 GCGTCGGGGCCCTCATCTGAAAATCCAGCGCACAGGCACGACCCCTTCAGGACATGAAAACCTGTGCTATAAGATGCGA  
80.61 CGGAAGAGGCCGACCGCAAGTTGTAAGTGTCTGAGAGTGGCTGGTGCATGAATGGAGTATGGGCTTTGGAGTT  
80.62 GGCCTTATAGACCTCTCTAATCCTGGTAGCATGGACCAGTGGAGAAAACCTCCATGTTTAACAAAAACCTTAACGCGA  
80.63 GCCCACTCCACTCTCGACCGTTTCTGGGTTCTTCGGGAAAAAAGCAACCTACTATTGACTATCGACGAAGATCTGTT  
80.64 TTCnAGCnTnTGATCCGAAnnnCACnGAGAAnnnCAAACAAnAAnATGCATATATTCGAAACCGmTTGTGATGAnnn  
80.66 CGGTGATGCTGACGAACATAAATGATCCCGTAATGACACACACCGGCGAGCCAAGTTGTCTCCCTCCTATTCGACTG  
80.67 CTGTCTGTCTACCTCCTTACGTTTACCCTTAACTTTCGGGAAAAAAGTTCGAGCTGCATGTTACCAGGACAACATC  
80.68 CCGACAAAACGACACAGATCCTGTGCCAGTGCCAGGCGAGAGTGTGAGAAAAAGAGTTTGGAGCGAAGTATGCG  
80.69 CCACGATGATTTGGAGGTACGCGGGATGGTGGTAAGGATAACCGTTGGTTCATCGGGATAAATGGCAACGCTGC  
80.70 GCCTAGGCCAATAATTAGTCCGCCACTACGTCGCCCTCTGTTCATCGTCAAACCCACCTGAGTTTATGTTACTTCTG  
80.71 TCATGTTGCGCGCAAACGGTATCACTCAAGTTGCTTCGGCACTTCAACGATGCACCTTTCGAAATCCTGGTCAAGAG  
80.73 GAGCGCAACATGATGATGCAATACCGACTCGCCACCAAGATCCTCACCGTACAGGAGGGACAATTTGACGTGAGAC  
80.74 TTGGTCTATACGATGTCTCTCCCATCCGTTTGTCTTCGGGACAAAGAACTAAAATGGAGCTATTCACCCAACG

80.75 TCCTCACCCAAATTGATCCGACGCGGACGGGACAATGCGCAACCTGCTACCACACCGTTCTCGGACTACCCCCCTCAG  
80.76 GTCCATGATCCGTGTCGAAACACGGGAGACAAATTCGGCTAAGAAGACACGGCCCTGATTATCCCCTTGGCGATGGA  
80.77 CTCACGCTTGACAACCACAAGGGGACAGAGCTAAGTTGTTATCCCTTNGCAACACCGACATTGCCGAGCGATGGTTATCA  
80.78 CGTCCACCCGTGAATACGGTCCAGATAATCCGACGGCAAACGGGAGAAGTCCAAAGCGCTGCTAACGGAACGTCCGTA  
80.79 TGCGGCTAGACTACATCTGCTCATTCAAATGGATTGAAACTTTACGTCACTCCCTTAAACTCCCTTCCCATCGTTTC  
80.80 TGCAGTTGTACAATCCGTTTTACTGTGTTCCGGGACAAAAACAGCAACATAGTAGCTATCGCTCAACCGGACATGCAAGA  
80.82 ACCCAAACCGAATATCCGGGACAGTCCCACTCGGGATAAGAATAGAGGACAATGAAAAGTGCAGGCAATAGAAAACCG  
80.83 TCGCTCTGAATGCATTGTTCCCATGCGAAATCCGAGGCCAAACGGGAAAAGATGGCACCCAGCGGTTGCGCTTnnn...  
80.84 CTCAGCCTGAGAAAATAATCCTCCCAGTGCCAAGAGGTGCAGATAGATTGGCACTCATTTCCTCCAAAGGTTNGC  
80.85 GCCCGGTACGAAACCGAGGTGTTAAACGGGAAAAACACAACGAACATCCGAGTATTCATGAACTGCGGTCCCTTAAAGACA  
80.86 CTGCTCAAACCAGCAAACATCCGTCGAGGATCGGGAAAACCTCCATATGCAAGAAAGCCGCAACCTGAGATGTACTA  
80.88 CGTTCACCTCCTCTGCCTTCTACGTCTATGCCTCCCGAACACACGTTGCCGACCCACCCTTCAAGTCTAGCCATA  
80.89 GCCAACTGCATCCGGGAGCGTTACGTGGGACATCATAGCGCAACGAACCTACCGCTTCAGCACACTCATCTGACA  
80.92 GCACTCCACAGGAAAACATGGAGGGCGGGTGGAAACGTGATAAGTGCCTGTGTGAATTTAAACCTTACGAGGCATCTTA  
80.93 CCTTCCACGACAAATCCTTATCGCATGCATGAGGGAGACCAGACAAGCATGTACAATCACCAGTTATGATAGTTCGAG  
80.96 CGCTTGATCGAACGAATTAGCGCGTAGGCTGCGGCCACACTGCCCAATCCCGATCGTAAGGGGATAGTACGGCGAGA  
80.97 CCGCGGAGTAAAGTTGTGGTCGTTGCAACGATATTCGGGAGGCTAGTGAGTGAAGTTTGATACCTGTGACACCAAGGC  
80.98 TTGCCAAAGAAATGATCCTGCGATTGCTGCCACGAGGGACTAAGAATGGGGCACATCACCGGTAGCCCTGAACTTGC  
80.99 TCGTGGCGCGAAACCTATCTACTAGATCTGGATTTATGCTTTTGTACCCGTTATCCCTTTCTAGTGGTTGGCTTGT  
80.101 CCCACGCAACGATACTCGTCGAACAAGGCCGACACCTACTTTCTCTCCCGCCCTGTAAAnnnnnnnnnnnnnnn...  
80.102 CCAATGGCACAGACATCGTAATCCGTATAGACCTGAGTACGGGACAAAACATATCAGGTATGAGAACAGAGGACTGCTG  
80.103 GCAACCGGTTGTCTACACGCGCGAATAGAGCCCGGTTCAAGGACACCGCCACTGCTGTCGACATTTCTTAGTGTAGA  
80.104 TCGACATGATGTGTGTAATTCCTGTTAGTCCGACGATGAATCTGTGCAGTGGAAACACAGGAAAAAATCCACACCGA  
80.105a CCAAGACGGTAGAGAATATCAGCGCTTTTCGAAAACATCCCGTGGGCCCGCACGGAGAAAATAACAAGGGACGA  
80.111 CCTAGGACGAAAGCGATAATCGGGCTGGAGGATCAAATTAATGCTGGCGCCAGGGGCAACGCATCTATGCACCTTAGG  
80.112 CGCCTACGTTGAAATCCGTGATTCCTATACCGGATATGCTATGGGTGCGGTTGCGGTGCCGAGTATCAATCCTG

## Supplementary Figure S1c.

### For 70HRT<sub>14</sub> set:

Reported previously: 54 total reads, 42 independent, 34 sampled once, 5 sampled twice  
Lower limit of sequence diversity from resampling statistics:  $N_{\text{Chou}} = 42 + (34)^2/(2 \cdot 5) = 158$

31 previously proposed F1Pk in 70HRT<sub>14</sub> with 5 of them sampled twice  
11 previously proposed F2Pk in 70HRT<sub>14</sub> with 2 of them sampled twice  
4 previously proposed non-pseudoknots in 70HRT<sub>14</sub> with 1 of them sampled twice  
(note: there were unrecognized triples in this set.)

29 sequences added subsequently, including 8 totally new species.

For complete LTS data set above: 83 total reads, 50 independent, 34 sampled once, 7 sampled twice.

Lower limit of sequence diversity from resampling statistics:  $N_{\text{Chou}} = 50 + (34)^2/(2 \cdot 7) = 121$

### For 80HRT<sub>14</sub> set:

Reported in JMB: 45 total reads, 44 independent, 42 sampled once, 2 sampled twice  
Lower limit of sequence diversity from resampling statistics:  $N_{\text{Chou}} = 44 + (42)^2/(2 \cdot 2) = 485$

19 80HRT<sub>14</sub> in family 1 with no doublets  
25 80HRT<sub>14</sub> in family 2 with 1 doublet  
0 80HRT<sub>14</sub> in family 3

31 sequences added subsequently, including 28 totally new species.

For complete LTS data set above: 76 total reads, 70 independent, 65 sampled once, 4 sampled twice.

Lower limit of sequence diversity from resampling statistics:  $N_{\text{Chou}} = 70 + (65)^2/(2 \cdot 4) = 536$

### For Combined sets:

Reported previously: 99 total reads, 86 independent sequences  
Current information: 159 total reads, 120 independent sequences

60 additional sequences, 39 of which are totally new.

Lower limit of sequence diversity from resampling statistics:

$$\text{Net } N_{\text{Chou}} = (121)_{70\text{HRT}_{14}} + (536)_{80\text{HRT}_{14}} = 657 \text{ minimum total species}$$
