# Supplementary material for: Potent Inhibition of HIV-1 Reverse Transcriptase and Replication by Nonpseudoknot, “UCAA-motif” RNA Aptamers
Source: PubMed Central journal article supplement — Mol Ther Nucleic Acids. 2013 Feb 5;2(2):e71–. doi: 10.1038/mtna.2012.62 (PMC3586799; doi:10.1038/mtna.2012.62), 2013-02-05
Supplement: mtna201262x2.pdf [file mtna201262x2.pdf]

## Supplementary Figure S2

a

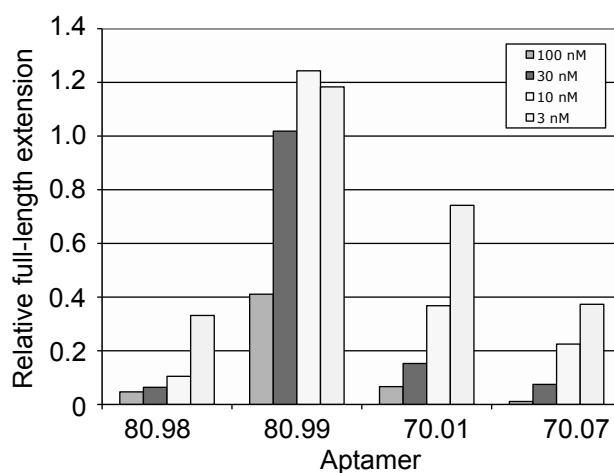

b

| BEST (32)          |       | VERY GOOD (31)     |         | MODEST (22)        |       | POOR (11) |       |
|--------------------|-------|--------------------|---------|--------------------|-------|-----------|-------|
| 70.05              | F1Pk  | <sup>a</sup> 70.01 | (6/5)AL | 70.02              | 1,2   | 70.03     | F1Pk  |
| 70.08              | F2Pk  | 70.07              | F2Pk    | 70.04              | 1,2   |           |       |
| 70.12              | F1Pk  | 70.17              | F1Pk    | 70.06              | F1Pk  | 80.01     | F1Pk  |
| 70.13              | F2Pk  | 70.24              | 1,2     | 70.14              | 1,2   | 80.10     | other |
| 70.16              | F1Pk  | 70.31              | F1Pk    | 70.15              | F1Pk  | 80.13     | other |
| 70.21              | 1,2   | 70.42              | F1Pk    | 70.18              | F1Pk  | 80.16     | other |
| 70.22              | F2Pk  | 70.52              | 1,2     | 70.19              | other | 80.28     | other |
| 70.26              | F1Pk  | 70.54              | F1Pk    | 70.27              | 1,2   | 80.68     | F2Pk  |
| 70.28              | F2Pk  | 70.59              | 1,2     | 70.41              | F1Pk  | 80.70     | other |
| 70.29              | F2Pk  | 70.65              | F2Pk    | 70.75              | 1,2   | 80.71     | other |
| 70.32              | F1Pk  | 70.67              | F1Pk    |                    |       | 80.97     | F2Pk  |
| 70.44              | 1,2   | 70.68              | F1Pk    | 80.02              | 1,2   | 80.101    | other |
| 70.53a             | 1,2   | 70.69              | 1,2     | 80.05              | 1,2   |           |       |
| 70.60              | other | 70.70              | F1Pk    | 80.09              | F2Pk  |           |       |
| 70.76a             | F1Pk  | 70.71              | F2Pk    | 80.18              | 1,2   |           |       |
| 70.78              | 1,2   | 70.77              | 1,2     | 80.32              | F2Pk  |           |       |
|                    |       |                    |         | 80.57              | F1Pk  |           |       |
| 80.02              | 1,2   | 80.33              | other   | 80.61              | other |           |       |
| 80.08              | 1,2   | 80.60              | other   | <sup>b</sup> 80.66 | F2Pk* |           |       |
| 80.17              | 1,2   | 80.63              | other   | 80.67              | F1Pk  |           |       |
| 80.35              | F1Pk  | 80.73              | F2Pk    | 80.69              | F1Pk  |           |       |
| 80.46              | F1Pk  | 80.74              | F2Pk    | 80.88              | other |           |       |
| 80.54              | 1,2   | 80.75              | 1,2     | 80.99              | other |           |       |
| <sup>c</sup> 80.55 | F2Pk* | 80.77              | other   |                    |       |           |       |
| 80.62              | F2Pk  | 80.78              | F1Pk    |                    |       |           |       |
| 80.64              | F1Pk  | 80.79              | other   |                    |       |           |       |
| 80.80              | 1,2   | 80.82              | 1,2     |                    |       |           |       |
| 80.85              | 1,2   | 80.86              | 1,2     |                    |       |           |       |
| 80.89              | F1Pk  | 80.87              | F2Pk    |                    |       |           |       |
| 80.93              | other | 80.90              | 1,2     |                    |       |           |       |
| 80.102             | 1,2   | 80.96              | F1Pk    |                    |       |           |       |
| 80.103             | other | 80.98              | F2Pk    |                    |       |           |       |
| 80.104             | F2Pk  |                    |         |                    |       |           |       |
| 80.105             | 1,2   |                    |         |                    |       |           |       |
| 80.111             | other |                    |         |                    |       |           |       |
