# Supplementary material for: Potent Inhibition of HIV-1 Reverse Transcriptase and Replication by Nonpseudoknot, “UCAA-motif” RNA Aptamers
Source: PubMed Central journal article supplement — Mol Ther Nucleic Acids. 2013 Feb 5;2(2):e71–. doi: 10.1038/mtna.2012.62 (PMC3586799; doi:10.1038/mtna.2012.62), 2013-02-05
Supplement: mtna201262x3.pdf [file mtna201262x3.pdf]

## Supplementary Figure S3

### F1Pk confirmed (12)

|            |        |               |       |                |      |               |          |                |    |
|------------|--------|---------------|-------|----------------|------|---------------|----------|----------------|----|
| 70.12      | gA     | <u>UCCG</u>   | AG    | <u>CCA</u>     | AAA  | <u>CGGG</u>   | AAAAGA   | <u>UGG</u>     | 27 |
| 70.21      | ggGAA  | <u>UCCG</u>   | AG    | <u>GCG</u>     | AAA  | <u>CGGG</u>   | AAAAGAC  | <u>CGC</u>     | 31 |
| 70.24*     | ggCA   | <u>UCC</u>    | CAA   | <u>GG</u>      | AGAA | <u>GGA</u>    | GAAAA    | <u>CC</u> AA   | 28 |
| 70.26      | GAA    | <u>UCCGUG</u> | AAGU  | <u>CACAG</u>   |      | <u>CACGGG</u> | AUAAAA   | <u>CUGUG</u>   | 35 |
| 70.54      | ggGAGA | <u>UGCG</u>   | AA    | <u>GG</u>      | AAAA | <u>CGGG</u>   | AUAA     | <u>CC</u>      | 28 |
| 70.55*     | ggaa   | <u>UCCC</u>   | AG    | <u>GCCU</u>    | AA   | <u>GGGG</u>   | ACAAC    | <u>gggca</u>   | 30 |
| 80.08      | ggg    | <u>UCCG</u>   | UUG   | <u>GCGAU</u>   |      | <u>CGGG</u>   | AGAA     | <u>AUCGC</u> A | 29 |
| (alt80.08) | ggg    | <u>UCCG</u>   | U     | <u>UGGCGAU</u> |      | <u>CGGG</u>   | AGAA     | <u>AUCGCA</u>  | 29 |
| 80.35      | ggg    | <u>UCCG</u>   | AU    | <u>GUCC</u>    | A    | <u>CGGG</u>   | AGUAA    | <u>GGAC</u>    | 27 |
| 80.80      | gAA    | <u>UCCG</u>   | UUUUA | <u>CUGUGUU</u> |      | <u>CGGG</u>   | ACAA     | <u>AACACAG</u> | 34 |
| 80.96*     | gAA    | <u>UCCC</u>   | GA    | <u>UCGU</u>    | AA   | <u>GGGG</u>   | AUAGUACG | <u>GCGA</u>    | 31 |
| t0.115.1   | GA     | <u>UCCC</u>   | A     | <u>UGGCA</u>   | A    | <u>GGGG</u>   | AUAA     | <u>UGCCA</u>   | 26 |
| t0.20.1    | gAAA   | <u>UCCC</u>   | AC    | <u>GAGCA</u>   | A    | <u>GGGG</u>   | AAAA     | <u>UGCUC</u>   | 29 |

\*the pseudoknot shown is different from the originally proposed pairing.

### F2Pk confirmed (9)

|            |           |               |         |                 |           |                |              |                   |    |
|------------|-----------|---------------|---------|-----------------|-----------|----------------|--------------|-------------------|----|
| 70.08      | GA        | <u>UCUGG</u>  | CA      | <u>GUGUC</u>    | ACAA      | <u>CCAGG</u>   | AAAAA        | <u>GACAC</u>      | 33 |
| 70.65      | GGgUAU    | <u>CCUC</u>   | AG      | <u>GCG</u>      | GA        | <u>GAGG</u>    | GACAAA       | <u>CGC</u>        | 30 |
| (alt70.65) | GGgUAU    | <u>CUC</u>    | AG      | <u>GCG</u>      | GAGA      | <u>GGG</u>     | ACAAA        | <u>CGC</u>        | 30 |
| 80.73      | gggACCAGA | <u>UCCUC</u>  | AC      | <u>CGUACAG</u>  |           | <u>GAGGG</u>   | ACAAA        | <u>UUGUACG</u> U  | 41 |
| 80.85      | ggAA      | <u>CCG</u>    | AAG     | <u>UGUU</u>     | AAA       | <u>CGG</u>     | GAAAAACAC    | <u>AACG</u>       | 49 |
| (alt80.85) | ggAA      | <u>CCG</u>    | AA      | <u>GUGUU</u>    | AAA       | <u>CGG</u>     | GAA          | <u>AACAC</u> AACG | 49 |
| 80.93      | gggAAA    | <u>UCCU</u>   | UAUCGCA | <u>UGCAUG</u>   |           | <u>AGGA</u>    | AAGCCAGACAAG | <u>CAUGUA</u>     | 45 |
| 80.62      | gAA       | <u>UCCUGG</u> | U       | <u>AGCAUGGA</u> |           | <u>CCAGUGA</u> | GAAAA        | <u>UCCAUGUU</u>   | 38 |
| 80.102**   | AA        | <u>UCCG</u>   | U       | <u>AUAG</u>     | ACCUGAGUA | <u>CGGG</u>    | ACAAAA       | <u>CUAU</u>       | 34 |
| 80.104     | gGAA      | <u>UCUGUG</u> | CA      | <u>GUGGAA</u>   |           | <u>CACAGG</u>  | GAAAAAA      | <u>UUCCAC</u>     | 37 |
| t240.7.1   | gA        | <u>UCCU</u>   | CAG     | <u>GCG</u>      | GAG       | <u>AGGG</u>    | ACAAAA       | <u>CGC</u>        | 28 |

\*\*Contains F1Pk stems but very long connector.

### Unable to confirm F2Pk identified manually in JMB96 (6)

|          |        |                     |             |             |         |                    |             |             |    |
|----------|--------|---------------------|-------------|-------------|---------|--------------------|-------------|-------------|----|
| 70.04    | GgGA   | <u>CUUCC</u>        | AAAAGAGA    | <u>UCC</u>  | A       | <u>GGGAG</u>       | CAGGCGCACUG | <u>GGA</u>  | 40 |
| 70.60    | gggAA  | <u>UGG</u>          | CAUCG       | <u>CUA</u>  | UGA     | <u>UCG</u>         | AGCGCUACGC  | <u>UAG</u>  | 35 |
| 80.33    | gggCCA | <u>AUCCG</u>        | UUACAA      | <u>uuga</u> | uu      | <u>cggau</u>       | gcuccgguagc | <u>ucaa</u> | 43 |
| 80.55    | ggg    | <u>uucc</u>         | auaAUGGC    | <u>UCA</u>  | CCACAAG | <u>GGGA</u>        | ACGU        | <u>UGA</u>  | 36 |
| 80.63    | ggCAC  | <u>UCCACUCUGACC</u> | GUUUC       | <u>UUG</u>  |         | <u>GGUUCUUCGGG</u> | AAAAAAAG    | <u>CAA</u>  | 48 |
| 80.96*** | gga    | <u>CCC</u>          | ACUAAUCCCGA | <u>UCGU</u> | AA      | <u>GGG</u>         | GAUAGUACG   | <u>GCGA</u> | 39 |

\*\*\*While this segment of 80.96 did not inhibit RT, there is a good F1Pk in a different region. See above.
