# Supplementary figures and images for: Potent Inhibition of HIV-1 Reverse Transcriptase and Replication by Nonpseudoknot, “UCAA-motif” RNA Aptamers
Source: PubMed Central journal article supplement — Mol Ther Nucleic Acids. 2013 Feb 5;2(2):e71–. doi: 10.1038/mtna.2012.62 (PMC3586799; doi:10.1038/mtna.2012.62), 2013-02-05

# Supplementary Figure S5

a

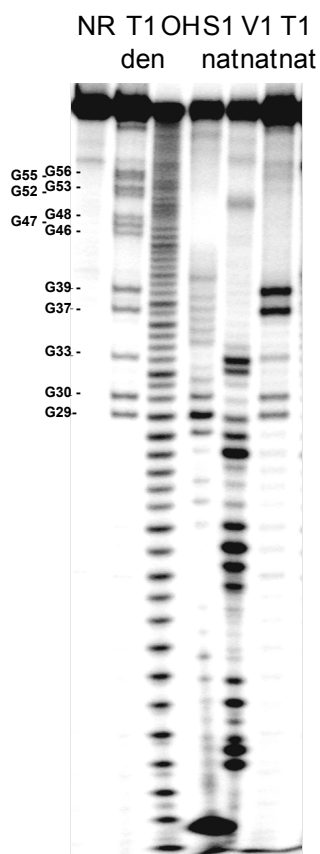

b

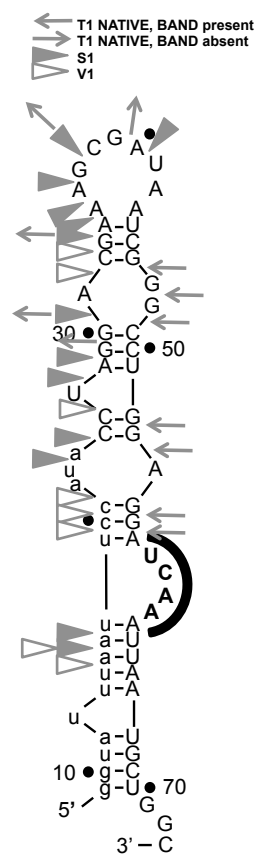

Supplement: mtna201262x5.pdf [file mtna201262x5.pdf]

# Supplementary Figure S6a

a

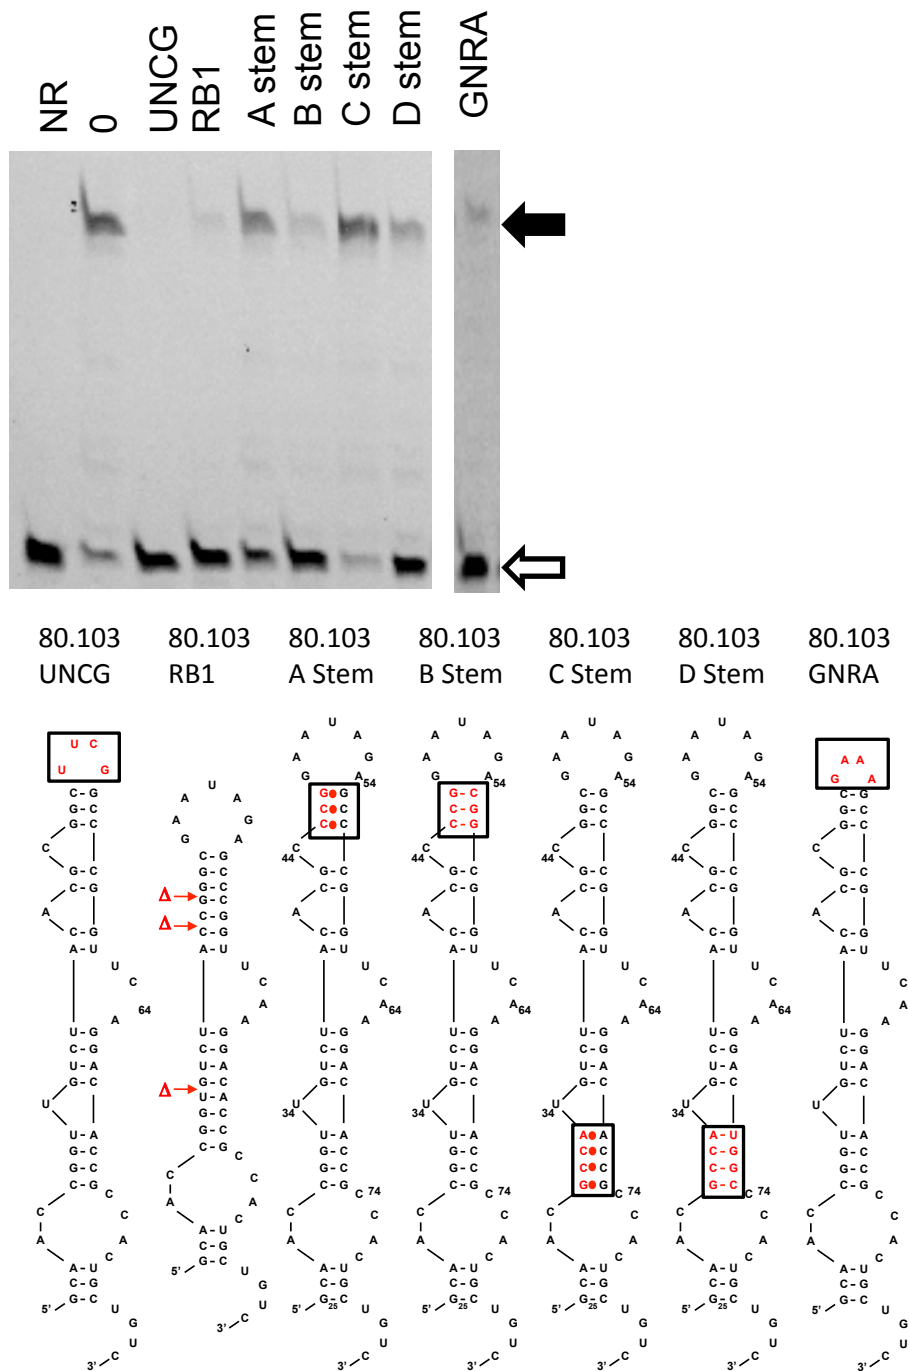

# Supplementary Figure S6b

b

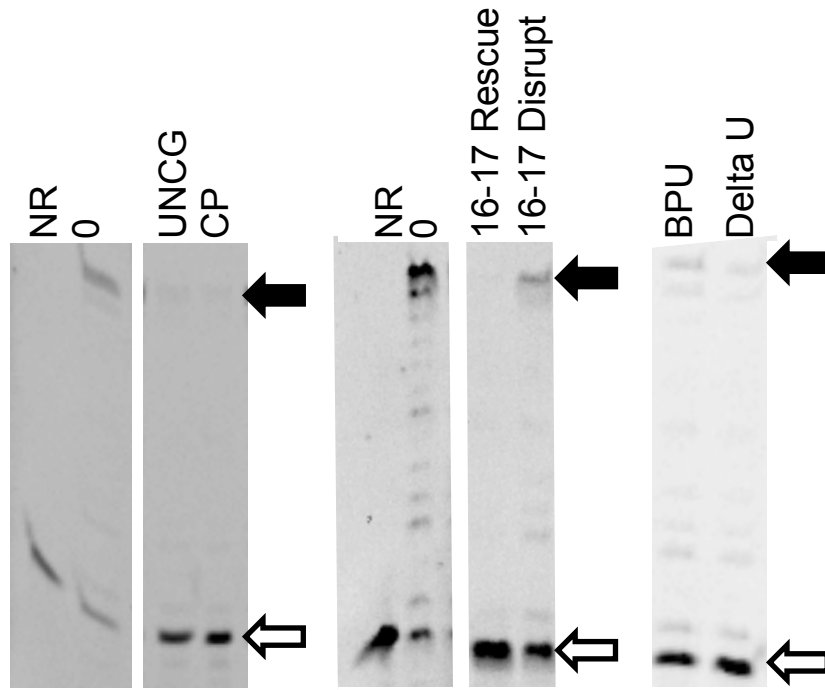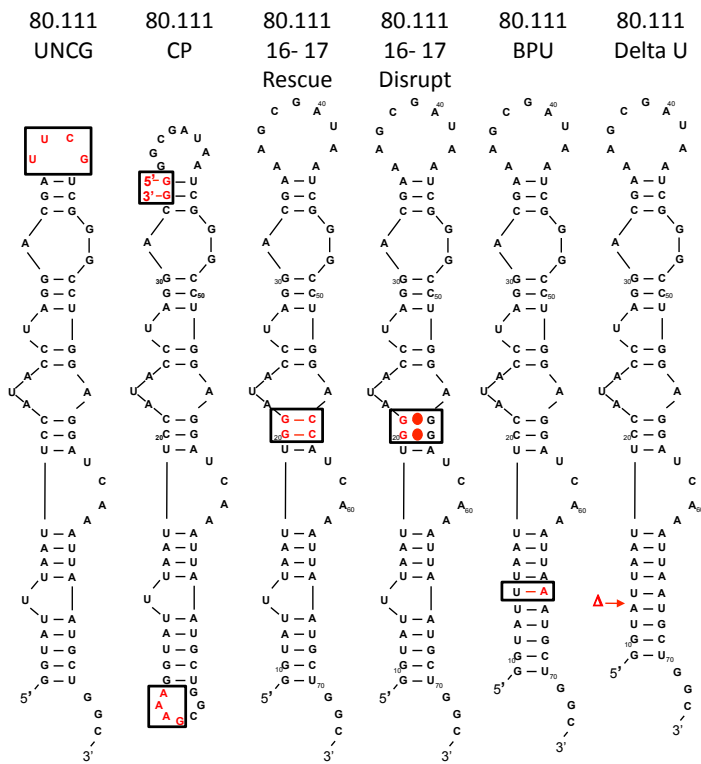

Supplement: mtna201262x6.pdf [file mtna201262x6.pdf]

# Supplementary Figure S7a and b

**a**

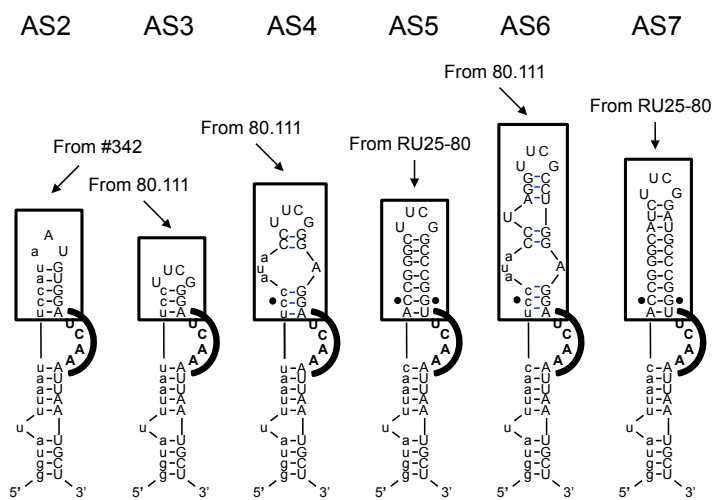

**b**

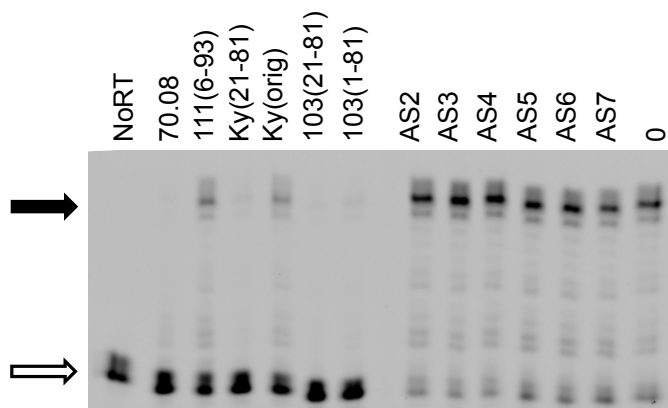

# Supplementary Figure S7c

**C**

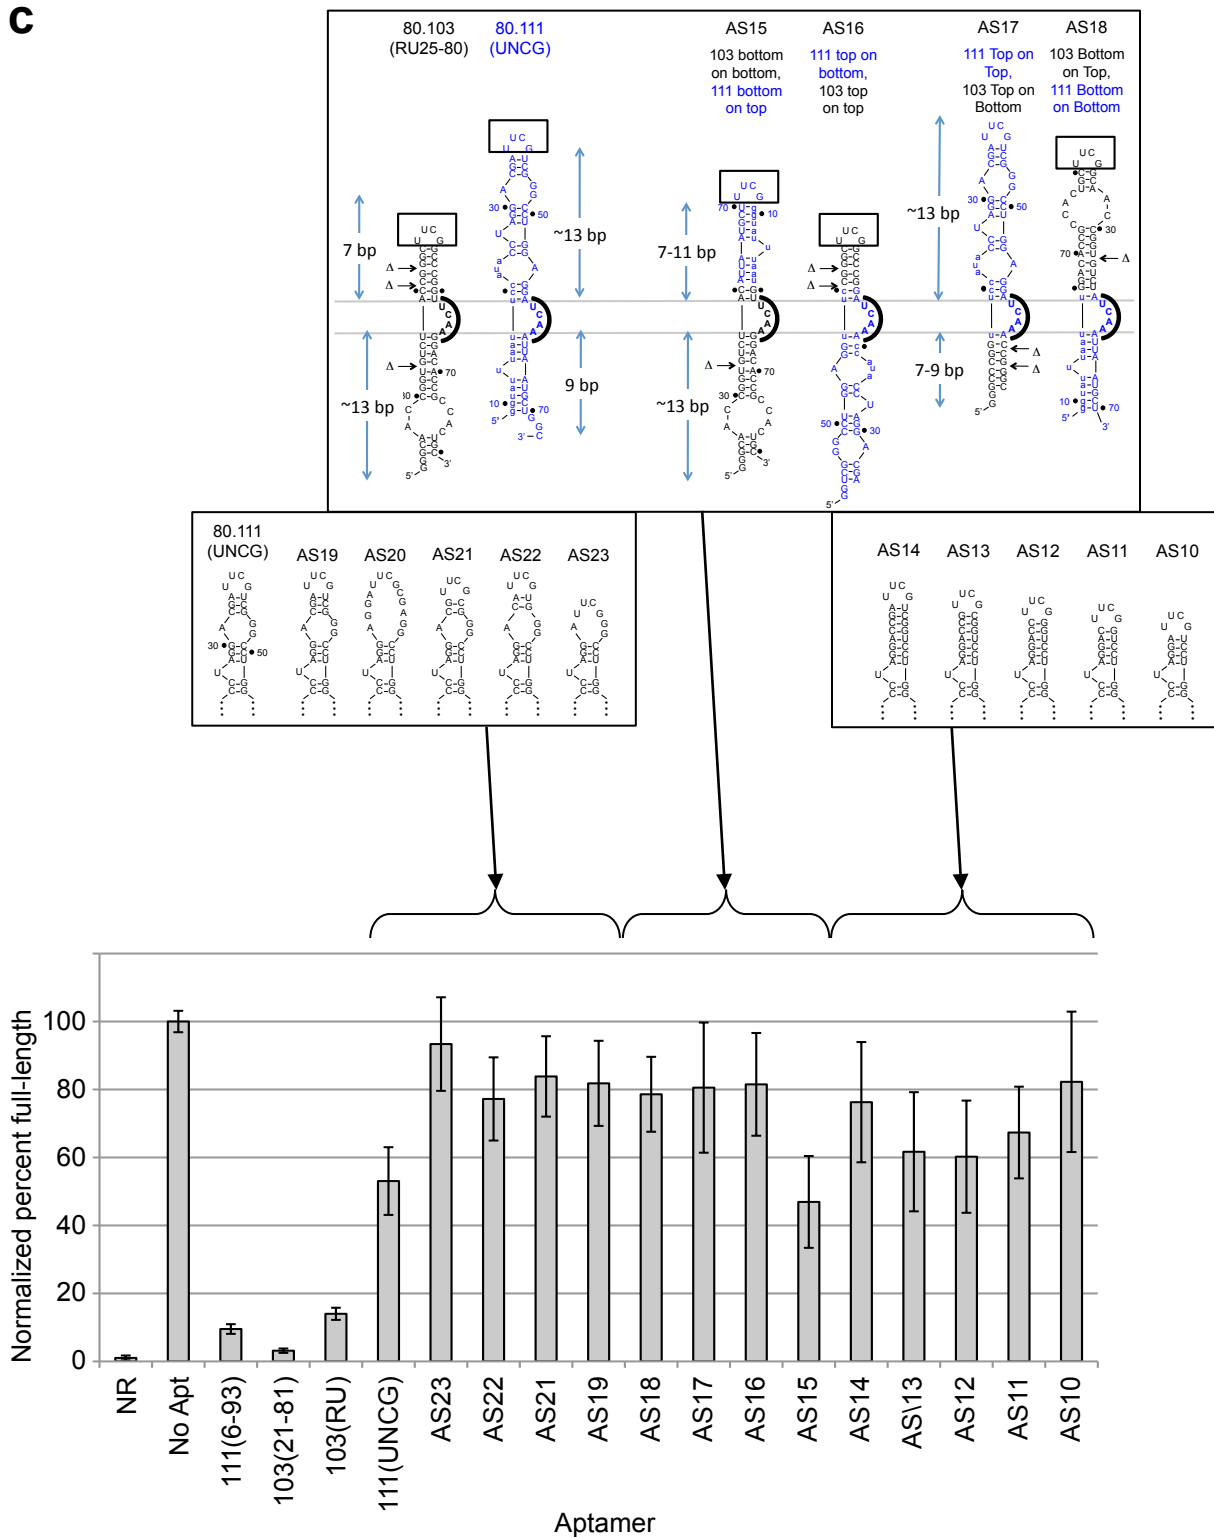

Supplement: mtna201262x7.pdf [file mtna201262x7.pdf]

## Supplementary Figure S8

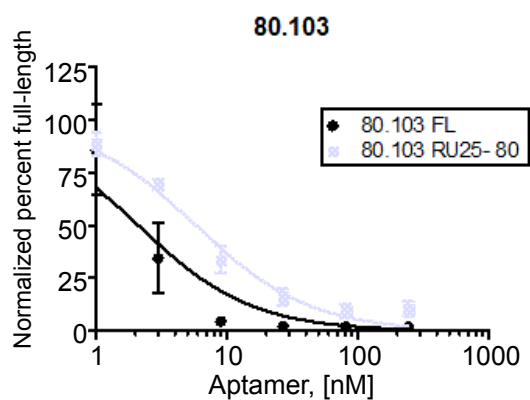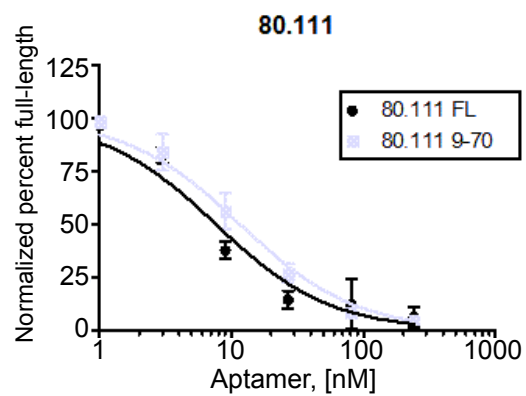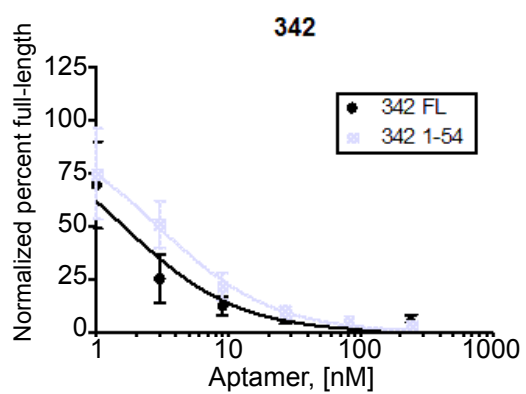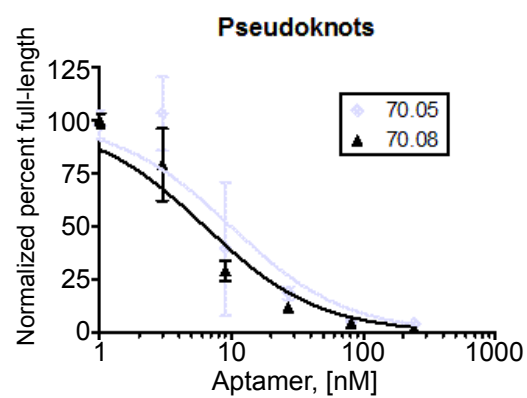

Supplement: mtna201262x8.pdf [file mtna201262x8.pdf]
